# Supplementary material
Source: PubMed Central journal article supplement (PMC4634211)
Supplement: ncomms9564-s1.pdf [file ncomms9564-s1.pdf]

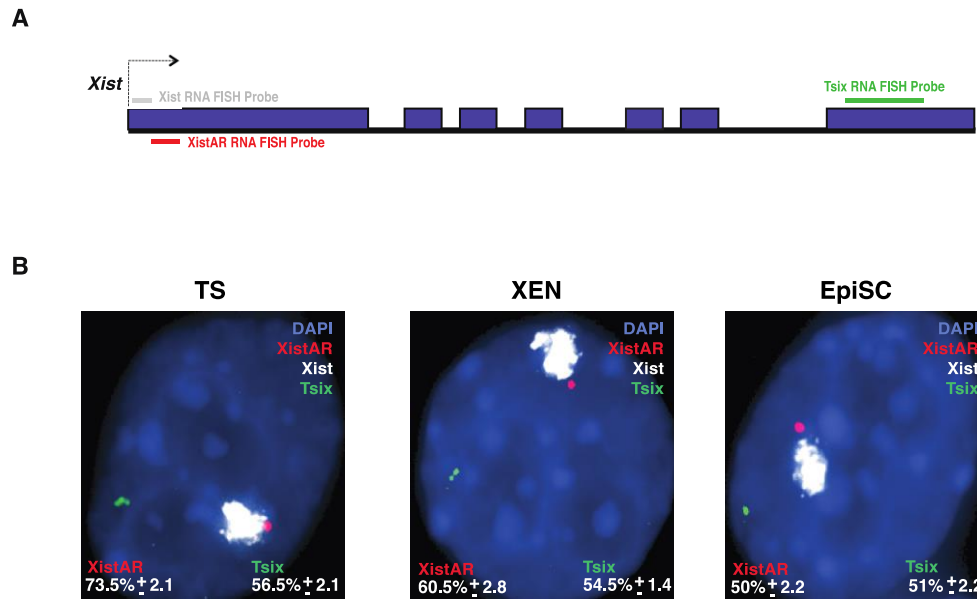

**Supplementary Fig. S1. Detection of XistAR, Tsix, and Xist RNAs in TS cells, XEN cells, and EpiSCs by RNA FISH.** (A) Schematic representation of the Xist locus and location of the different strand specific RNA FISH probes used. (B) Strand-specific RNA FISH detection of Xist (white), XistAR (red) and Tsix (green) RNAs in TS, XEN and EpiSC cell lines. Nuclei are stained blue with DAPI. Two different TS, XEN and EpiSC cell lines were stained and >100 nuclei counted in each cell line. Numerical values in the images indicate the percentage of nuclei that display XistAR and Tsix RNA signals. ± standard deviation.

**Supplementary Table 1: List of Primers**

| <b>Primer</b>  | <b>Sequence</b>                | <b>Use</b> | <b>Figure(s)</b> |
|----------------|--------------------------------|------------|------------------|
| AUAP           | GGCCACGCGTCGACTAGTAC           | PCR        | 1, 3             |
| XistF7         | (AUAP)-GCTCCAGCCATGTTTGCTCGTT  | RT         | 3                |
| XF13           | (AUAP)-GCCATGTTTGCTCGTTTCCC    | RT         | 3                |
| XF718          | (AUAP)-CGGGGCGCTTGGTGGATGGAAAT | RT         | 1, 3             |
| XF1440         | (AUAP)-GTGGCACATGCTCTTGAATG    | RT         | 3                |
| XR1648         | GGCAACCAACACTTCCACTT           | PCR        | 3                |
| XR2530         | AGCTCGGTGGATGAGTTTGA           | Nested PCR | 3                |
| XR2640         | AAAAGCAAAGCCTGAACTGG           | PCR        | 3                |
| XR1502         | AACCACTAGAGGGCAGGTCA           | Nested PCR | 1, 3             |
| XR9572         | CCAGGCAATCCTTCTTCTTG           | PCR        | 6                |
| XF9229         | GACAACAATGGGAGCTGGTT           | RT, PCR    | 6                |
| XR926          | CGTATCACGCAGAAGCCATA           | PCR        | 3, 6             |
| XR883          | CCCTGAACACCCACTCAGTT           | Nested PCR | 3, 6             |
| XF1851         | GGAGAGCGCATGCTTGAAT            | PCR        | 3                |
| XF2121         | GCCTCTGATTTAGCCAGCAC           | Nested PCR | 3                |
| XF2296         | TATTTTGGATGCCAACGACA           | Nested PCR | 3                |
| XF953          | (T7)-AATTAGGACACCGAGGAGCA      | FISH       | 1, 6             |
| XR1440         | (T3)-CACAAAGCCCTTTGCGTTAT      | FISH       | 1, 6             |
| XistF          | CAAGAAGAAGGATTGCCTGGATTT       | PCR        | 6                |
| XistR-biotin   | GCGAGGACTTGAAGAGAAGTTCTG       | RT, PCR    | 6                |
| Xist-seq       | CAAACAATCCCTATGTGA             | PCR        | 6                |
| Utx-F-biotin   | CCAAAAGCATTATCTGCATACCA        | PCR        | 6                |
| Utx-R          | CCAAACCAAGACCATATAAAAAGG       | RT, PCR    | 6                |
| Utx-seq        | TAGAACTTCCTTCAGGC              | Pyroseq.   | 6                |
| Rnf12-F-biotin | TGCAGCCAACAAGTGAAATTCC         | PCR        | 6                |
| Rnf12-R        | TATCTGCTGTCTCAGGGTCACATG       | RT, PCR    | 6                |
| Rnf12-seq      | TAGAACTTCCTTCAGGC              | Pyroseq.   | 6                |
| Atrx-F         | ATAGCTTCAGATTCTGATGAAACC       | PCR        | 6                |
| Atrx-R-biotin  | ACATCGTTGTCACTGCCACTT          | RT, PCR    | 6                |

|                |                                |            |     |
|----------------|--------------------------------|------------|-----|
| Atrx-seq       | TAAGCTCAGATGAAAAGA             | Pyroseq.   | 6   |
| Pdha1-F-biotin | AGCAATCTTGCAAGTGTTGAAGAA       | PCR        | 6   |
| Pdha1-R        | TTTTCAAGCCTTTTGTTGTCTGG        | RT, PCR    | 6   |
| Pdha1-seq      | TAGAACTTCCTTCAGGC              | Pyroseq.   | 6   |
| P1             | (AUAP)-GGCCAGGCTGGAGCTCTCAG    | RT         | 6   |
| P2             | ACAAAGATTGGGCTGTGCGAG          | PCR        | 6   |
| P3             | GCACAACCCCGCAAATGCTA           | Nested PCR | 6   |
| D1             | (AUAP)-CGGGGCGCTTGGTGGATGGAAAT | RT         | 6   |
| D2             | CCCTGCTGTGCTCAGATCAA           | PCR        | 6   |
| D3             | CCCTGAACACCCACTCAGTT           | Nested PCR | 6   |
| XF720          | GGGCGCTTGGTGGATGGAAAT          | RT-qPCR    | 6   |
| XR883          | CCCTGAACACCCACTCAGTT           | RT-qPCR    | 6   |
| DR1            | CCCTGCTGTGCTCAGATCAA           | RT-qPCR    | 6   |
| PF3            | TGGGAAAGCAAATCTCAGG            | RT-qPCR    | 6   |
| XR941          | TGGCTCGAGAATAGCCGTAT           | RT-qPCR    | 6   |
| XF1440         | GTGGCACATGCTCTTGAATG           | RT-qPCR    | 6   |
| XR1648         | GGCAACCAACACTTCCACTT           | RT-qPCR    | 6   |
| XF2350         | AAAACCGAAGTGATTGTTTTCAAA       | RT-qPCR    | 5,6 |
| XR2483         | TTTGAGTATCATCTGCCAAAAA         | RT-qPCR    | 5,6 |
| TF5            | GTTTCATGCGTGCGCACGTGTA         | RT, PCR    | 6   |
| TR732          | GGAGAGCGCATGCTTGCAAT           | RT,PCR     | 5,6 |
| TF350          | CCTGCAAGCGCTACACACTT           | PCR        | 5   |
